# Supplementary material
Source: ML conference proceedings conference paper supplement (https://proceedings.mlr.press/v119/jorgensen20a.html)
Supplement: Supplementary file 1 [file jorgensen20a-supp.pdf]

---

# Stochastic Differential Equations with Variational Wishart Diffusions

## *Supplementary Material*

---

Martin Jørgensen<sup>1</sup> Marc Peter Deisenroth<sup>2</sup> Hugh Salimbeni<sup>3</sup>

### 1. RMSE plot and further results

A plot of the test-set RMSE, relative to SGP, is provided in Figure 1. Further, we have included the actual results for reproducibility; these can be seen in Table 1.

| Dataset                 |                    | bike                | boston                | concrete           | kin8nm           |
|-------------------------|--------------------|---------------------|-----------------------|--------------------|------------------|
| Dimension               |                    | 14                  | 13                    | 8                  | 8                |
| Test-set log-likelihood | No noise           | -0.4169 ± 0.0235    | -1442.5453 ± 512.4655 | -25.4477 ± 12.9521 | 1.1458 ± 0.0696  |
|                         | diffGP             | -0.6842 ± 0.1143    | -2.7586 ± 0.7301      | -3.0401 ± 0.1460   | 1.3046 ± 0.0302  |
|                         | diffWGP (rho = 5)  | -0.6569 ± 0.0381    | -3.1014 ± 0.8984      | -3.0164 ± 0.1352   | 1.3123 ± 0.0305  |
|                         | diffWGP (rho = 10) | -0.7171 ± 0.1621    | -2.9540 ± 0.8506      | -3.0141 ± 0.1559   | 1.3021 ± 0.0304  |
| Test-set RMSE           | No noise           | 0.0706 ± 0.0305     | 4.7823 ± 1.0100       | 7.5674 ± 1.3031    | 0.0688 ± 0.0026  |
|                         | diffGP             | 0.1845 ± 0.0507     | 2.9628 ± 0.6991       | 4.9913 ± 0.6657    | 0.0646 ± 0.0021  |
|                         | diffWGP (rho = 5)  | 0.1737 ± 0.0254     | 3.1713 ± 0.8296       | 4.9086 ± 0.6442    | 0.0642 ± 0.0023  |
|                         | diffWGP (rho = 10) | 0.1935 ± 0.0919     | 3.0800 ± 0.8009       | 4.8708 ± 0.7079    | 0.0649 ± 0.0024  |
| Dataset                 |                    | naval               | power                 | protein            | wine_white       |
| Dimension               |                    | 26                  | 4                     | 9                  | 11               |
| Test-set log-likelihood | No noise           | NA                  | -2.8269 ± 0.0618      | -2.7678 ± 0.0187   | -7.2889 ± 0.9605 |
|                         | diffGP             | 7.2256 ± 0.0949     | -2.7753 ± 0.0402      | -2.8599 ± 0.0109   | -1.0616 ± 0.0448 |
|                         | diffWGP (rho = 5)  | 8.2736 ± 0.0677     | -2.7736 ± 0.0413      | -2.8342 ± 0.0114   | -1.0603 ± 0.0443 |
|                         | diffWGP (rho = 10) | 8.2696 ± 0.0575     | NA                    | -2.8480 ± 0.0103   | -1.0620 ± 0.0448 |
| Test-set RMSE           | No noise           | NA                  | 3.8966 ± 0.1674       | 3.8029 ± 0.0552    | 0.9298 ± 0.0543  |
|                         | diffGP             | < 0.0001 ± < 0.0001 | 3.8497 ± 0.1496       | 4.1717 ± 0.0479    | 0.7001 ± 0.0295  |
|                         | diffWGP (rho = 5)  | < 0.0001 ± < 0.0001 | 3.8492 ± 0.1502       | 4.0677 ± 0.0484    | 0.6980 ± 0.0296  |
|                         | diffWGP (rho = 10) | < 0.0001 ± < 0.0001 | NA                    | 4.1267 ± 0.0441    | 0.7003 ± 0.0296  |

Table 1. Test set log-likelihood and RMSE on 8 UCI benchmark datasets. Mean and standard deviations over 20 splits.

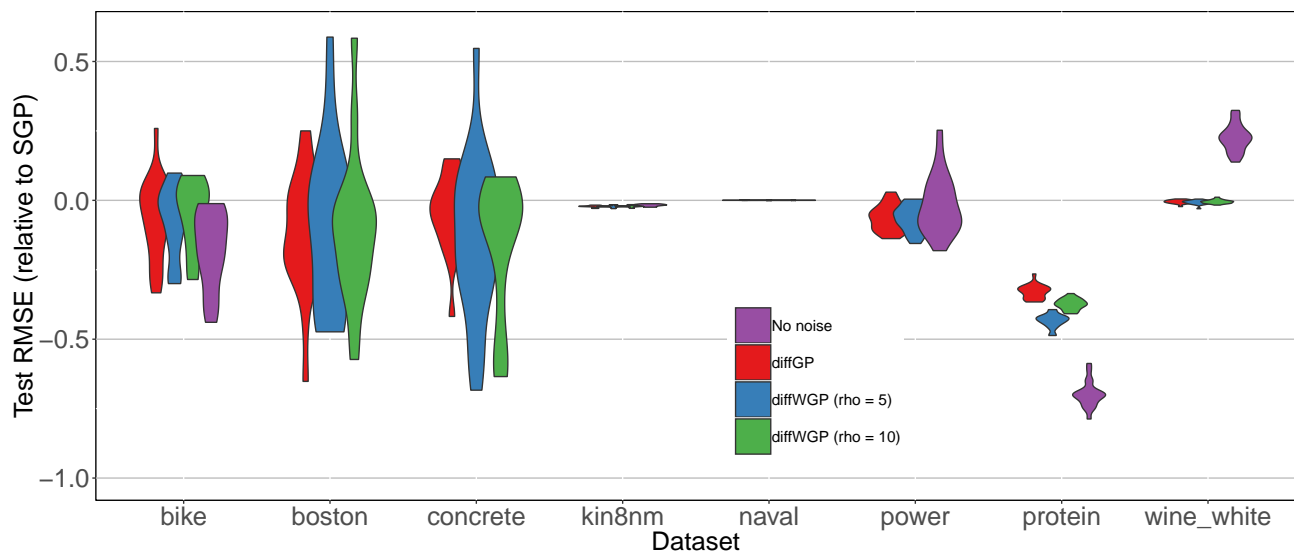

Figure 1. Test-set RMSE values on eight UCI regression datasets. The violin plots show the test-set RMSE difference of baseline diffusion models with respect to the SGP baseline. Values less than 0 indicate an improvement over SGP. We remark that this Figure has been cut for readability—this explains why occasionally purple violins are missing.
